# Supplementary material for: Characterization of Melanoma Cell Lines Resistant to Vemurafenib and Evaluation of Their Responsiveness to EGFR- and MET-Inhibitor Treatment
Source: MDPI journal article supplement (doi:10.3390/ijms21010113), 2019-12-23
Supplement: s1 [file s1]

# SUPPLEMENTARY FILE

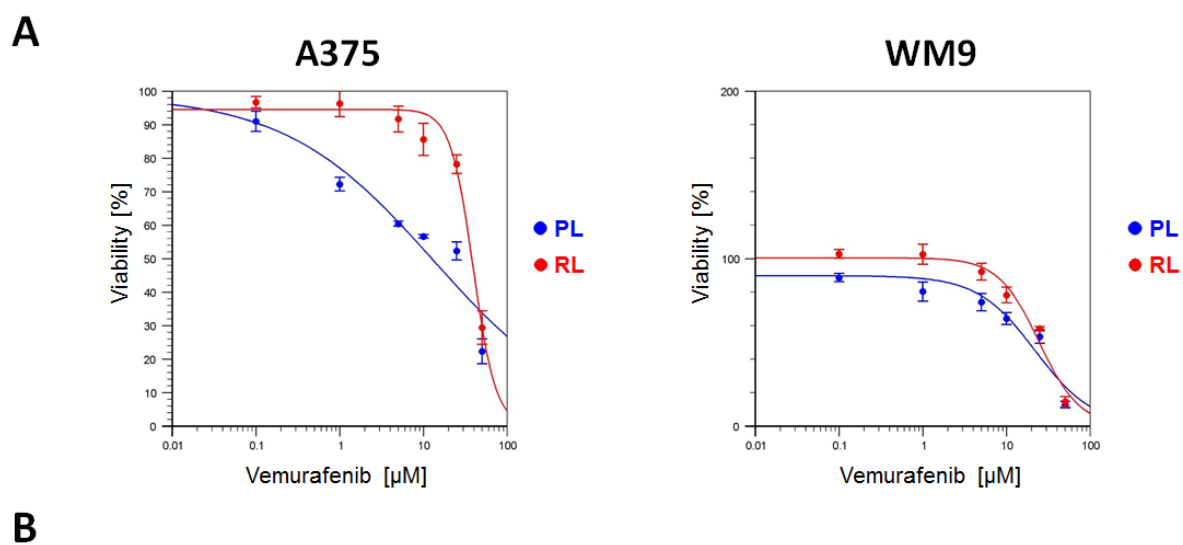

**Figure S1.** Evaluation of sensitivity of examined parental (PL) and resistant (RL) cells to vemurafenib treatment. **(A)** Dose-response graphs and **(B)** IC<sub>50</sub> values were calculated using Quest Graph™ IC<sub>50</sub> Calculator, based on data obtained in XTT assay.

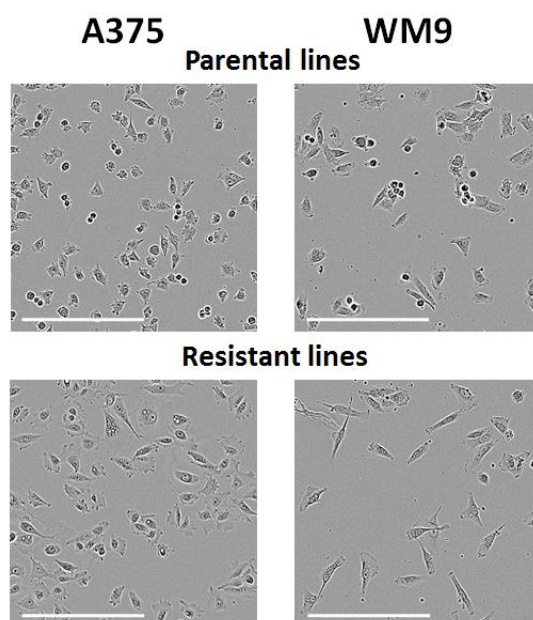

**Figure S2.** Characterization of resistant cells. Morphology of parental (PL) and resistant (RL) cells seeded on Matrigel-coated culture plates visualized with IncuCyte Live-Imaging System using their High Definition (HD) Phase-Contrast Imaging Mode. Scale bar is set at 300 μm.
